# Supplementary material for: Preparation of recyclable CdS photocatalytic and superhydrophobic films with photostability by using a screen-printing technique
Source: Royal Society of Chemistry journal article supplement (doi:10.1039/c5ta04065e), 2015-01-01
Supplement: c5ta04065e1.pdf [file c5ta04065e1.pdf]

## Preparation of Recyclable CdS Photocatalytic and Superhydrophobic Film with Photostability by Screen-printing Technique

Yong Chen,<sup>a</sup> Feng Li,<sup>a</sup> Wei Cao<sup>b</sup> and Taohai Li<sup>a\*</sup>

Table S1 The average weight value of CdS films

| No.          | Mass (glass) | Mass (glass/CdS films) | Mass (CdS films) |
|--------------|--------------|------------------------|------------------|
| 1            | 27.388 g     | 27.451 g               | 0.063 g          |
| 2            | 27.500 g     | 27.562 g               | 0.062 g          |
| 3            | 30.768 g     | 30.829 g               | 0.061 g          |
| 4            | 29.445 g     | 29.503 g               | 0.058 g          |
| 5            | 29.568 g     | 29.630 g               | 0.062 g          |
| 6            | 29.168 g     | 29.225 g               | 0.057 g          |
| 7            | 30.036 g     | 30.096 g               | 0.060 g          |
| 8            | 27.775 g     | 27.832 g               | 0.057 g          |
| 9            | 28.366 g     | 28.426 g               | 0.060 g          |
| 10           | 29.458 g     | 29.519 g               | 0.061 g          |
| Average mass |              |                        | 0.060 g          |

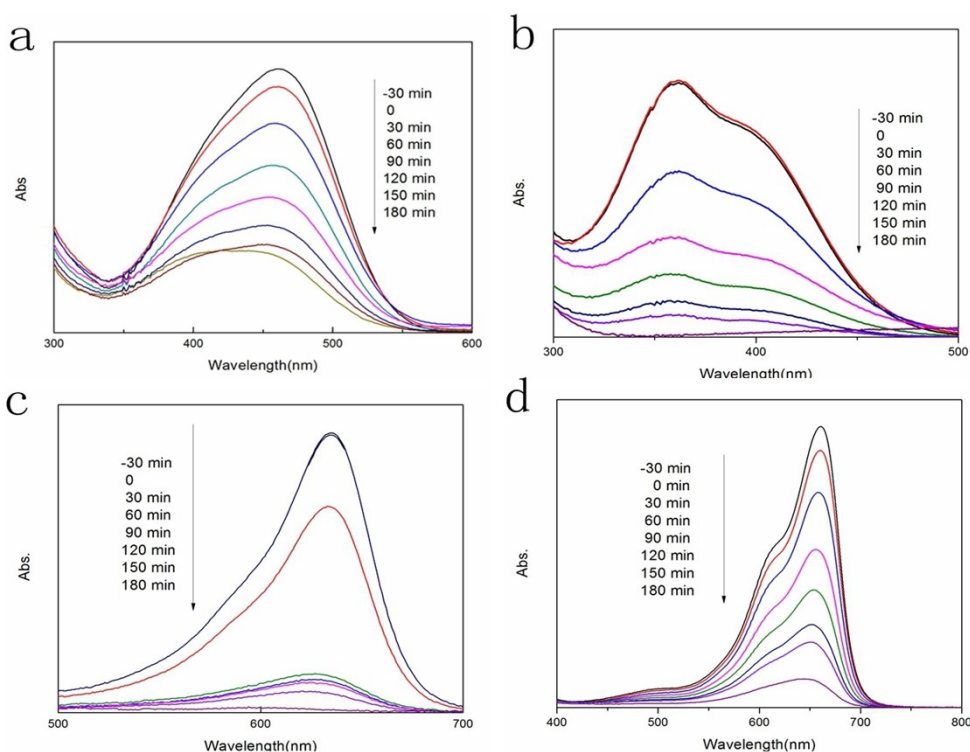

Figure S1. The temporal evolution of the spectra during the photodegradation of organic pollutants mediated by CdS film and H<sub>2</sub>O<sub>2</sub>. (a) MO; (b) 2,4-NP; (c) CB; (d) MB.

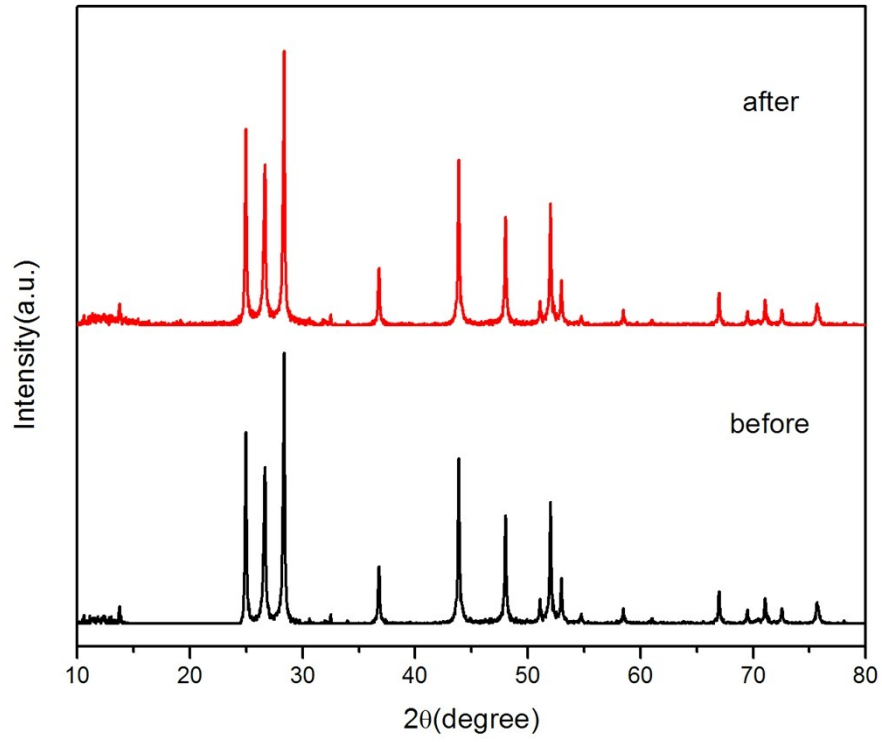

Figure S2. XRD image of the CdS film after five cycles of the photodegradation test.

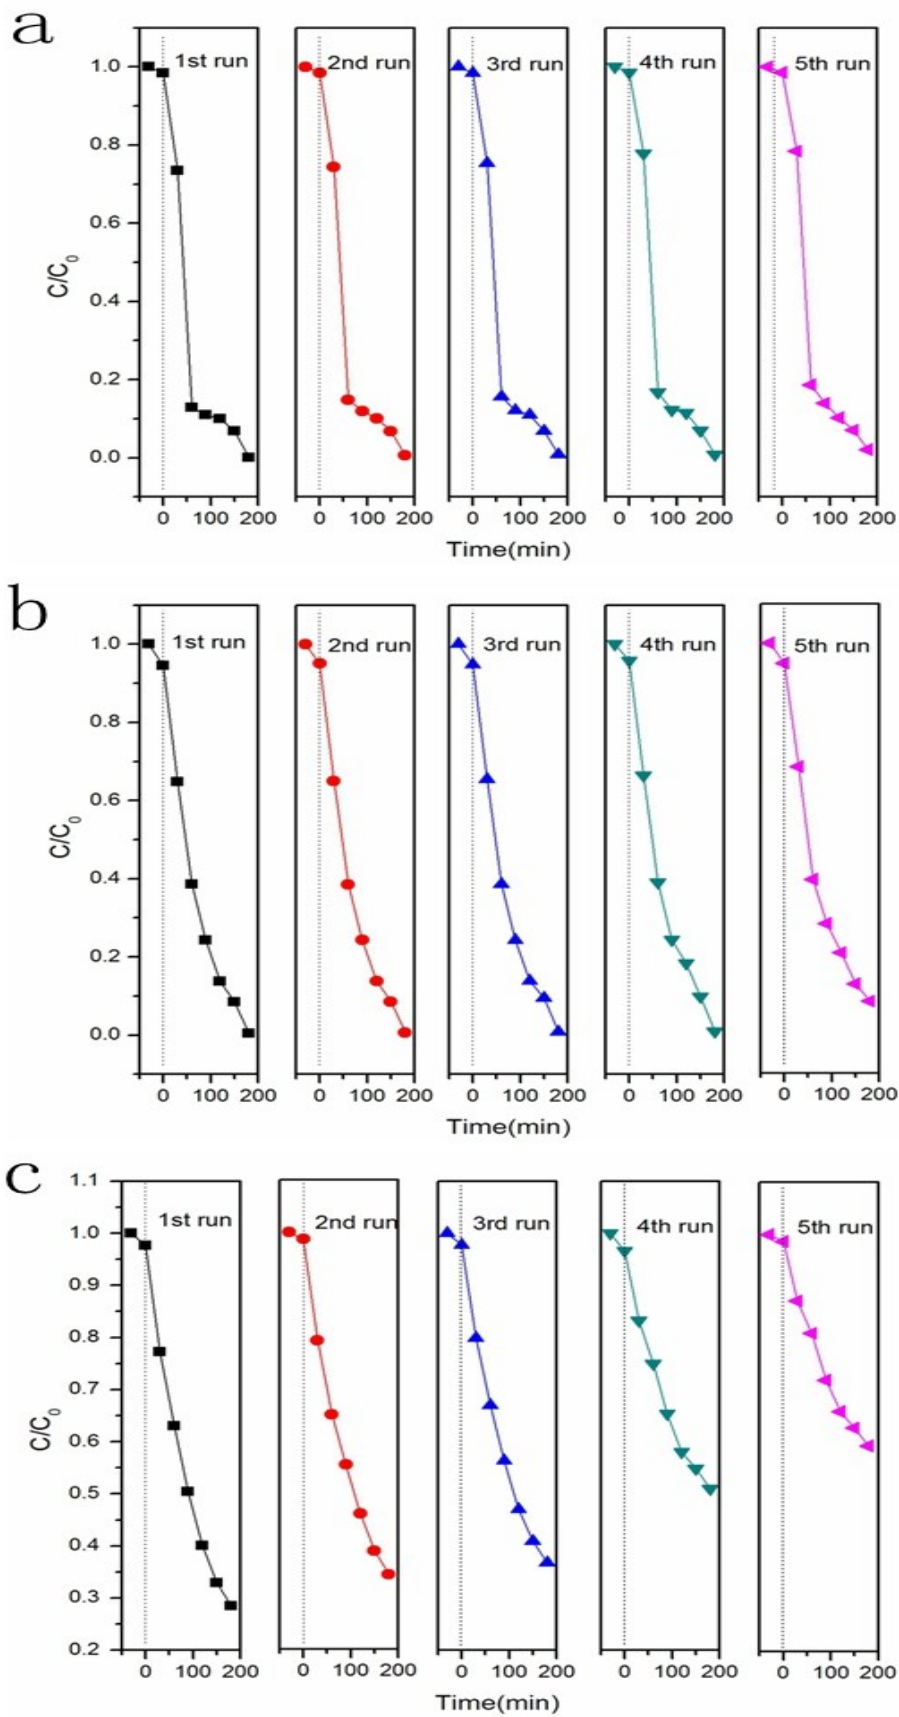

Figure S3. Cycling experiments of organic pollutants degradation over CdS film.(a) 2,4-DNP; (b) CB; (c) MO.
